# Supplementary material
Source: PubMed Central journal article supplement (PMC4382924)
Supplement: Supp_Fig1.pdf [file Supp_Fig1.pdf]

## Supplementary Data

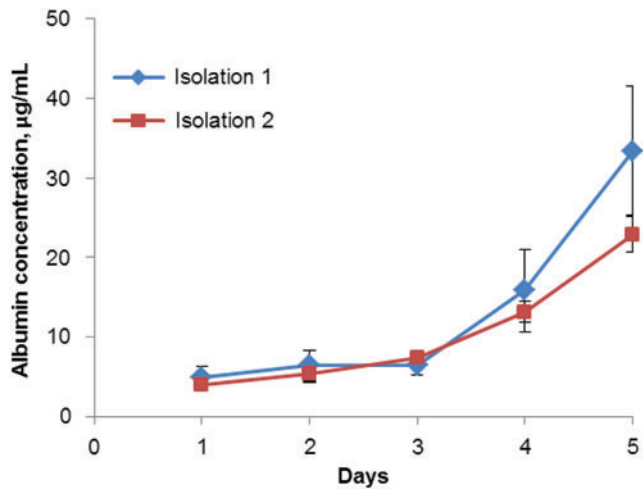

**SUPPLEMENTARY FIG. S1.** Albumin secretion from hepatocytes from two isolations used in a single experiment to make coculture configurations. Plot showing albumin secretions from hepatocytes (0.5 million in 0.5 mL) in sandwich culture from two different isolations.
