# Supplementary material
Source: PubMed Central journal article supplement (PMC4382924)
Supplement: Supp_Fig2.pdf [file Supp_Fig2.pdf]

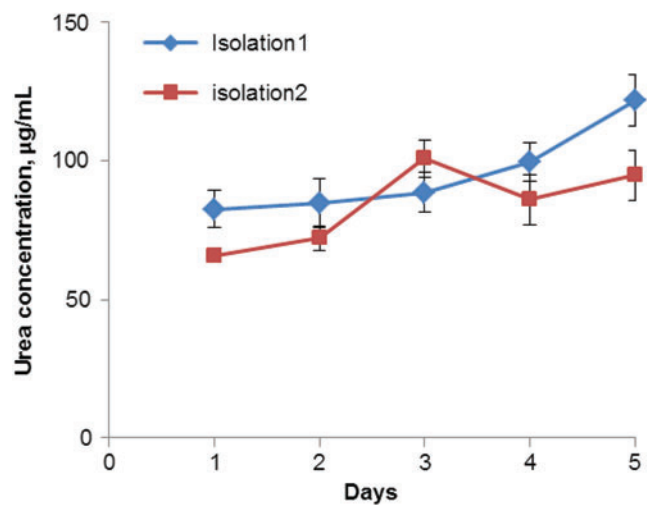

**SUPPLEMENTARY FIG. S2.** Urea synthesis from hepatocytes from two isolations used in a single experiment to make coculture configurations. Plot showing urea synthesis from hepatocytes (0.5 million in 0.5 mL) in sandwich culture from two different isolations.
