# Supplementary material
Source: PubMed Central journal article supplement (PMC4382924)
Supplement: Supp_Fig3.pdf [file Supp_Fig3.pdf]

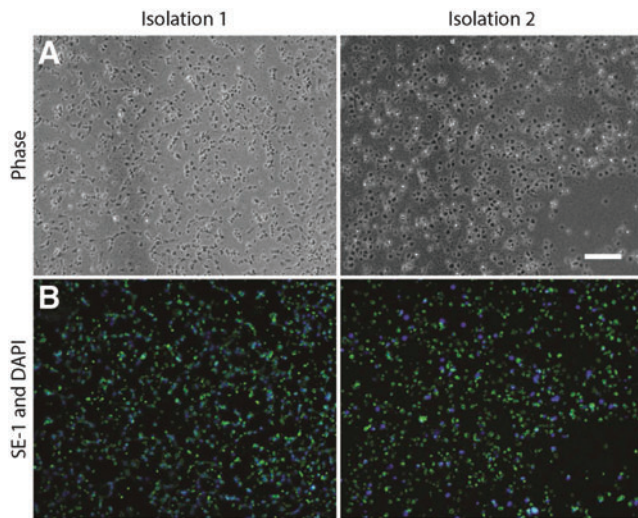

**SUPPLEMENTARY FIG. S3.** Sinusoidal endothelial 1 (SE-1) stain of liver sinusoidal endothelial cells (LSECs) from both isolations used in a single experiment to make coculture configurations. **(A)** Phase Images and **(B)** SE-1 immunostaining LSECs in sandwich culture from different isolations (Day 3) showing similar expression. Scale bar is 100  $\mu\text{m}$ .
