# Supplementary material
Source: PubMed Central journal article supplement (PMC4382924)
Supplement: Supp_Fig4.pdf [file Supp_Fig4.pdf]

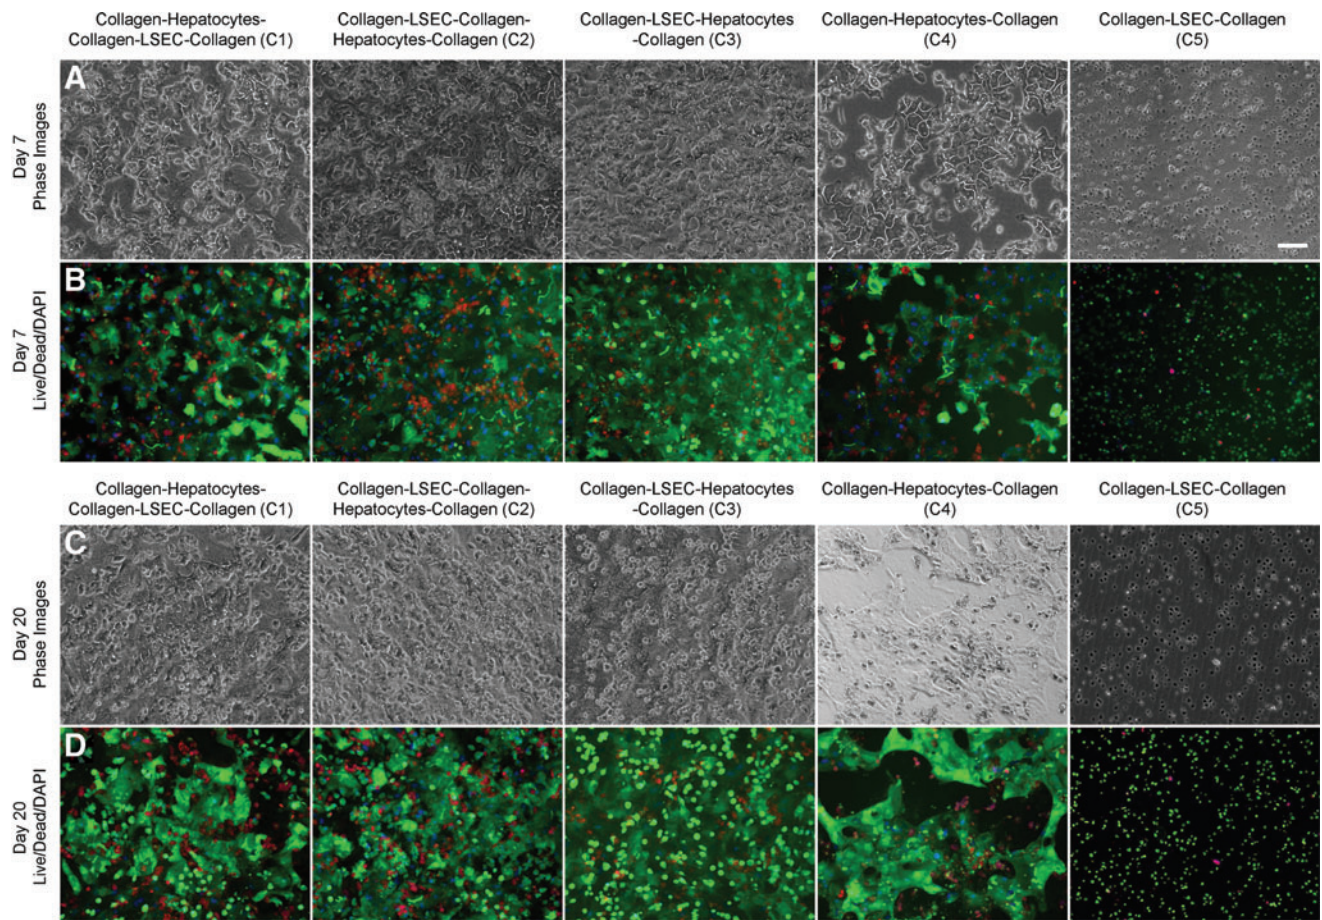

**SUPPLEMENTARY FIG. S4.** Phase and Live/Dead microscopy images of coculture configurations on Days 7 (**A, B**) and 20 (**C, D**) of culture. C1, C2, and C3 show stable hepatocyte morphology with high viability up to 4 weeks. C4 shows loss of hepatocyte morphology and viability when compared with coculture configurations. C5 (LSEC) show good cell morphology and viability up to 4 weeks. Scale bar is 100  $\mu\text{m}$ .
