# Supplementary material
Source: PubMed Central journal article supplement (PMC4382924)
Supplement: Supp_Fig5.pdf [file Supp_Fig5.pdf]

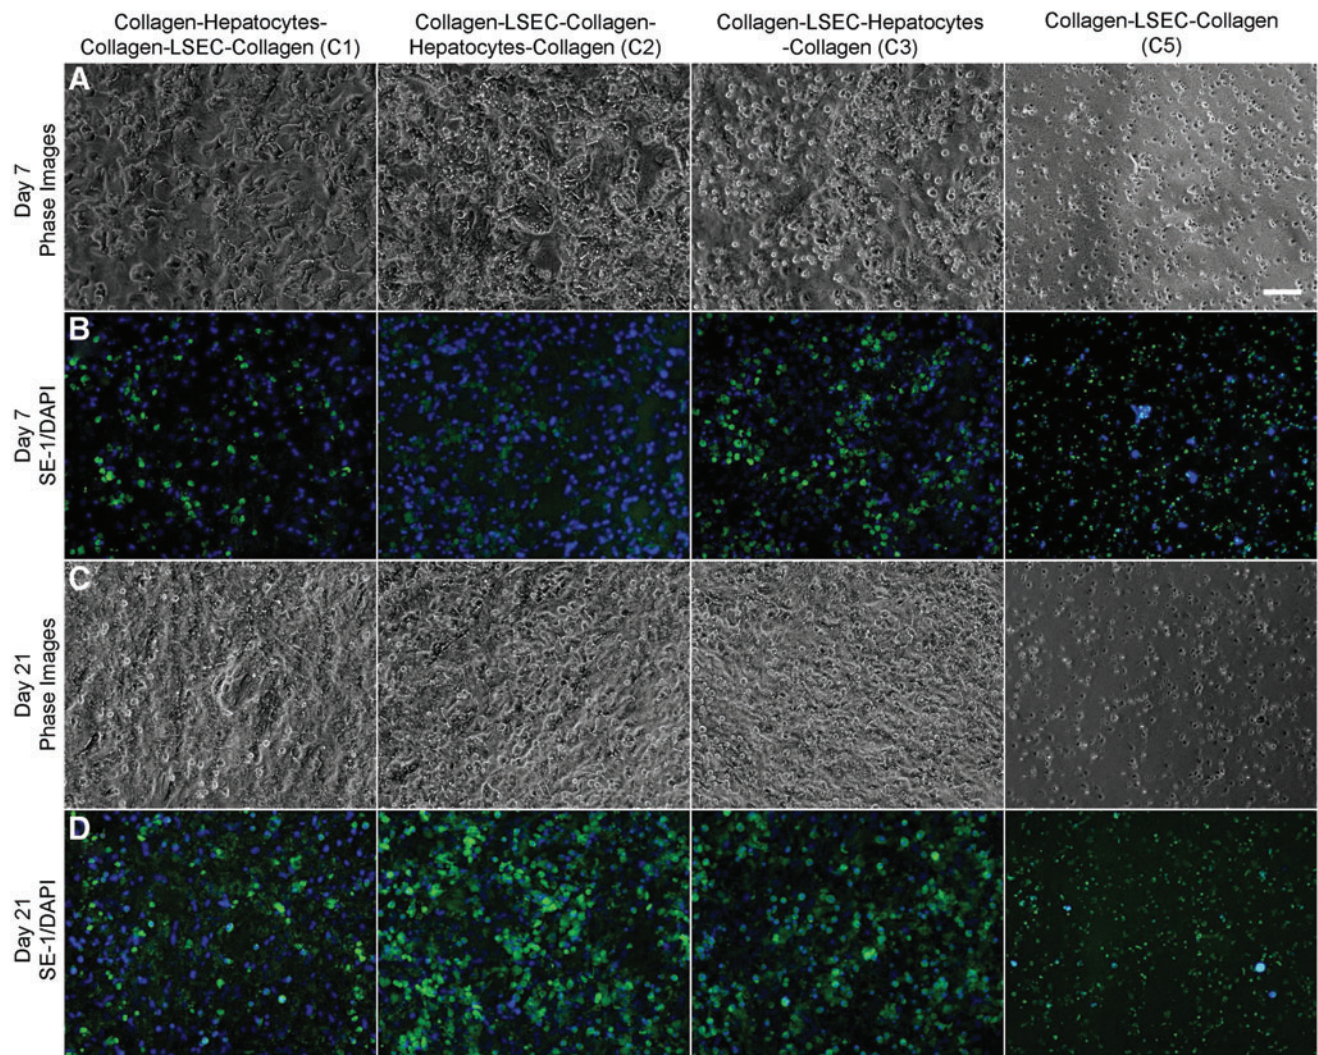

**SUPPLEMENTARY FIG. S5.** SE-1 expression of LSECs within cocultures on Days 7 (**A, B**) and 21 (**C, D**) of culture. C1 showed decrease in SE-1 expression whereas C2 and C3 show high SE-1 expression up to 4 weeks. C5 (LSECs only) shows similar levels of SE-1 expression. Scale bar is 100  $\mu$ m.
