# Supplementary material
Source: PubMed Central journal article supplement (PMC4382924)
Supplement: Supp_Figs7-9.pdf [file Supp_Figs7-9.pdf]

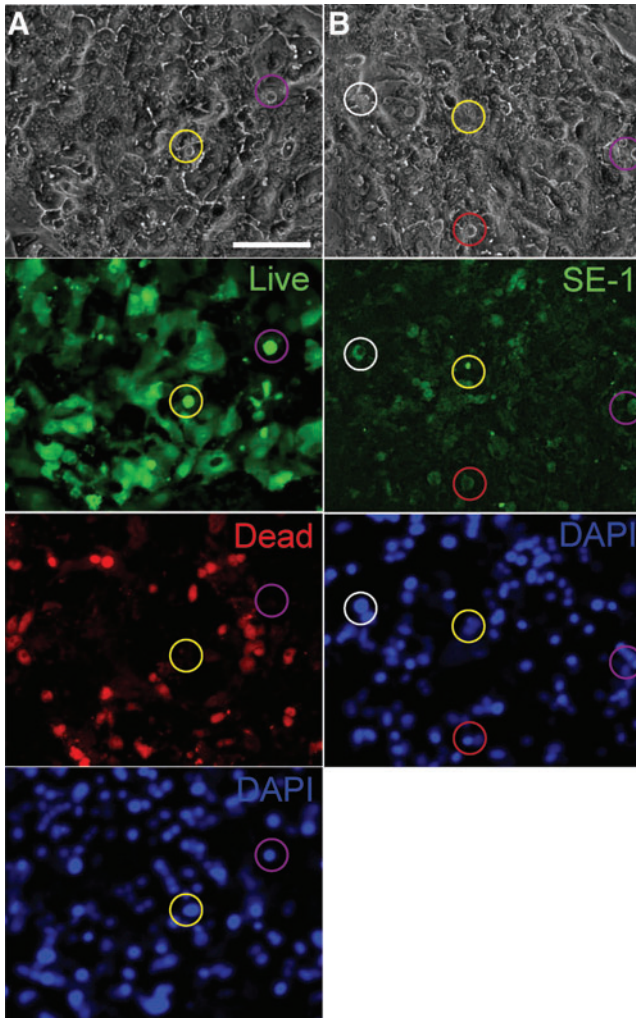

**SUPPLEMENTARY FIG. S7.** (A) Live/Dead and (B) SE-1 expression of C1 cultures on Day 28. Scale bar = 100  $\mu$ m.

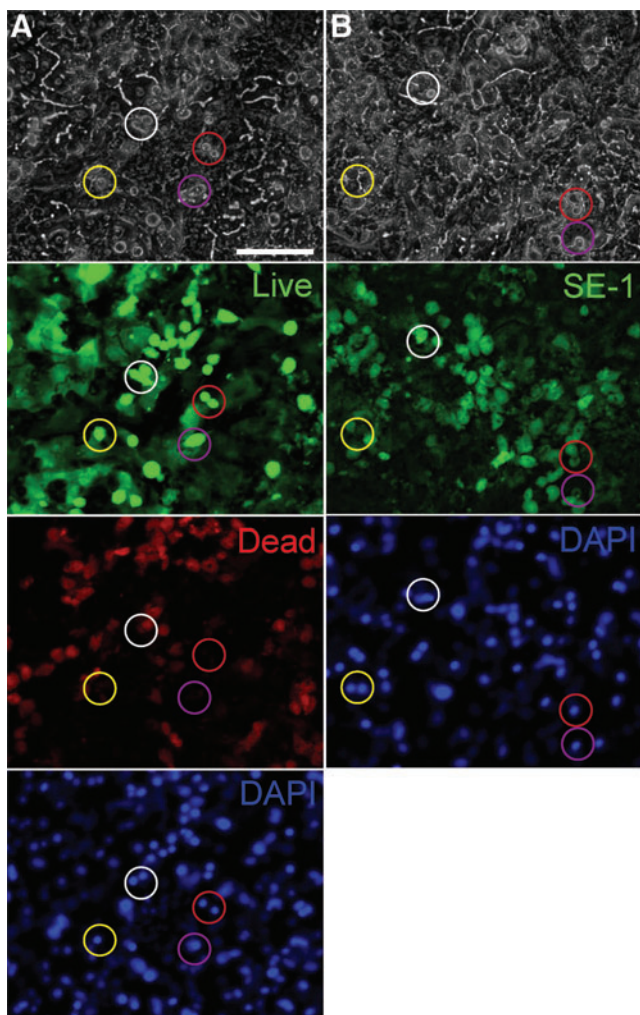

**SUPPLEMENTARY FIG. S8.** (A) Live/Dead and (B) SE-1 expression of C2 cultures on Day 28. Scale bar = 100  $\mu$ m.

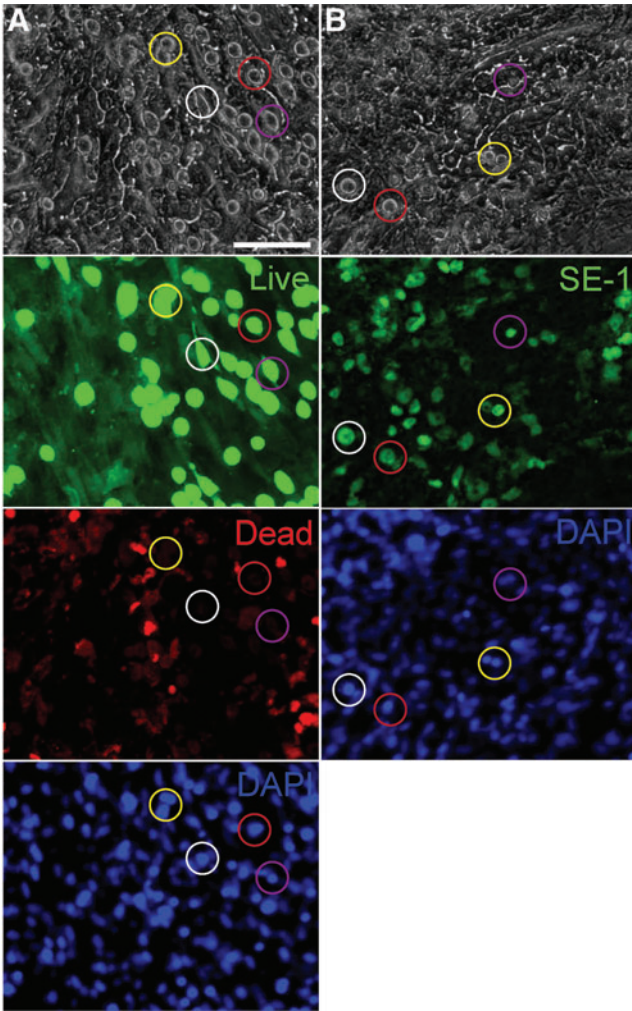

**SUPPLEMENTARY FIG. S9.** (A) Live/Dead and (B) SE-1 expression of C3 cultures on Day 28. Scale bar = 100  $\mu\text{m}$ .
