# Supplementary material
Source: PubMed Central journal article supplement (PMC4382924)

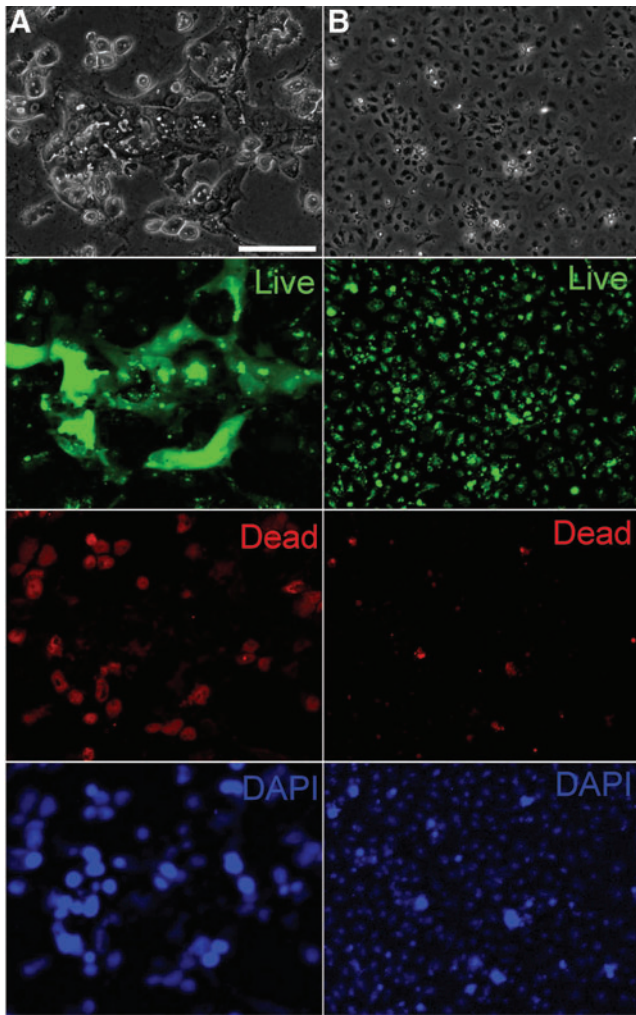

**SUPPLEMENTARY FIG. S6.** Live/Dead images of (A) C4 and (B) C5 cultures on Day 28. Scale bar=100  $\mu\text{m}$ .

Supplement: Supp_Fig6.pdf [file Supp_Fig6.pdf]

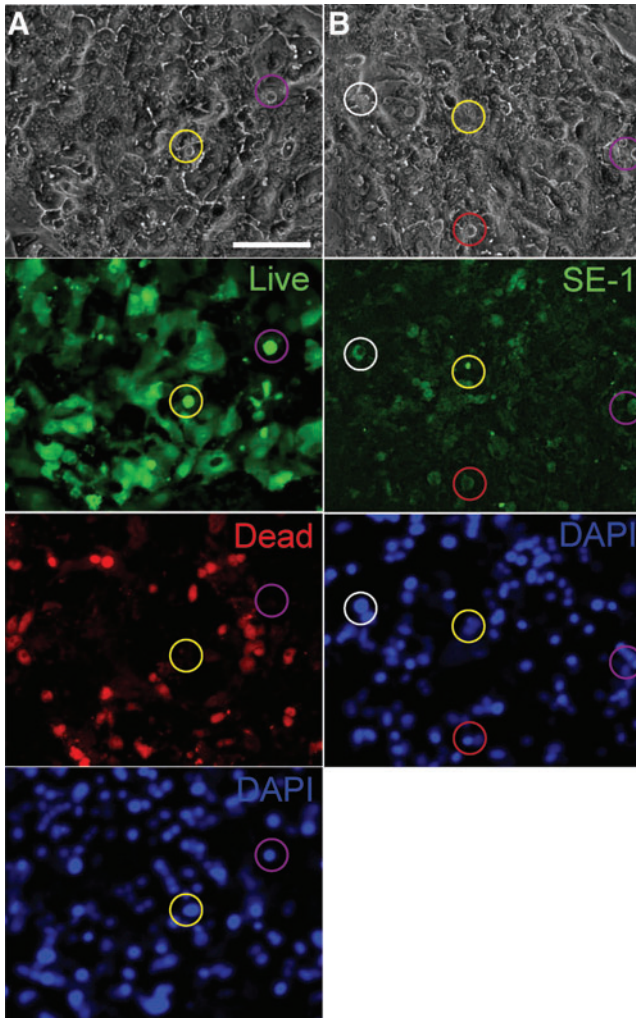

**SUPPLEMENTARY FIG. S7.** (A) Live/Dead and (B) SE-1 expression of C1 cultures on Day 28. Scale bar = 100  $\mu$ m.

Supplement: Supp_Fig7.pdf [file Supp_Fig7.pdf]

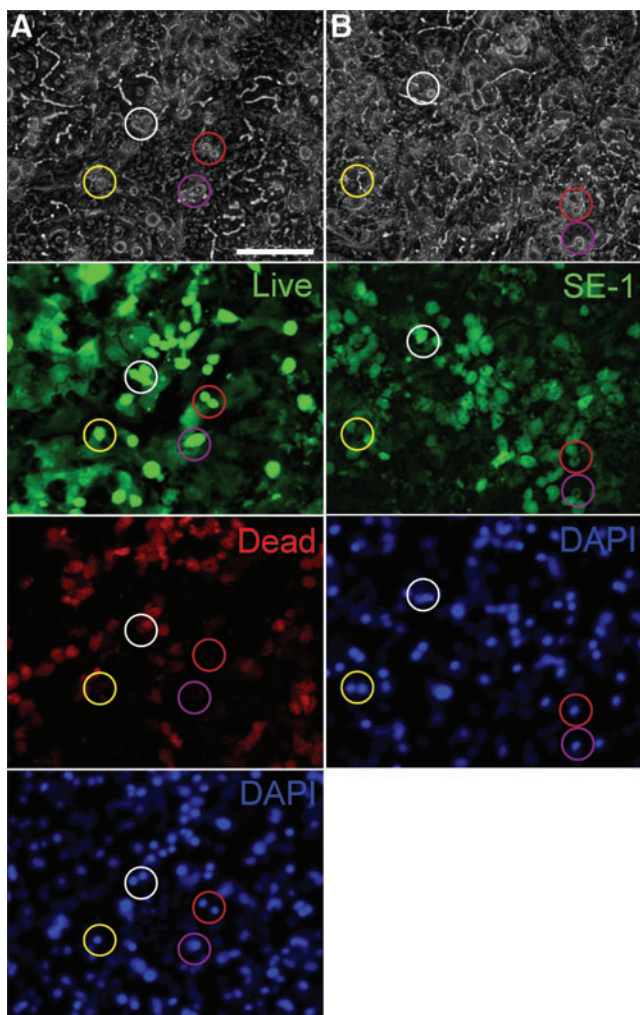

**SUPPLEMENTARY FIG. S8.** (A) Live/Dead and (B) SE-1 expression of C2 cultures on Day 28. Scale bar = 100  $\mu$ m.

Supplement: Supp_Fig8.pdf [file Supp_Fig8.pdf]

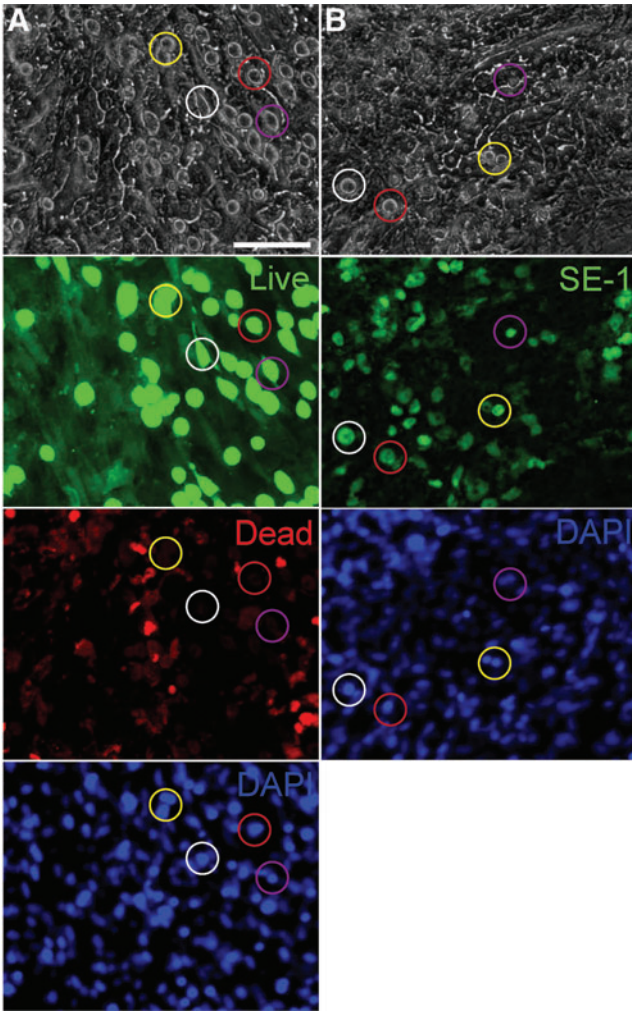

**SUPPLEMENTARY FIG. S9.** (A) Live/Dead and (B) SE-1 expression of C3 cultures on Day 28. Scale bar = 100  $\mu\text{m}$ .

Supplement: Supp_Fig9.pdf [file Supp_Fig9.pdf]
